# Supplementary material for: Integrated analysis of behavioral, epigenetic, and gut microbiome analyses in AppNL-G-F, AppNL-F, and wild type mice
Source: PubMed Central journal article supplement (PMC7907263; doi:10.1038/s41598-021-83851-4), 2021-02-25
Supplement: 41598_2021_83851_MOESM8_ESM.pdf [file 41598_2021_83851_MOESM8_ESM.pdf]

Integrated analysis of behavioral, epigenetic, and gut microbiome analyses in *App<sup>NL-G-F</sup>*, *App<sup>NL-F</sup>*, and wild type mice

Payel Kundu<sup>1\*</sup>, Eileen Ruth S. Torres<sup>1\*</sup>, Keaton Stagaman<sup>2</sup>, Kristin Kasschau<sup>2</sup>, Mariam Okhovat<sup>3</sup>, Sarah Holden<sup>1</sup>, Samantha Ward<sup>3</sup>, Kimberly A. Nevonon<sup>3</sup>, Brett A. Davis<sup>3</sup>, Takahashi Saito<sup>4</sup>, Takaomi C. Saido<sup>5</sup>, Lucia Carbone<sup>3, 6-8</sup>, Thomas J. Sharpton<sup>2,9</sup>, Jacob Raber<sup>1,10#</sup>

## Supplementary Table Legends

**Table S1.** Reduced Representation Bisulfite Sequencing of genome-wide patterns of DNA methylation in the hippocampus of the female *App<sup>NL-G-F</sup>*, *App<sup>NL-F</sup>* and WT control mice show low levels of CHG and CHH methylation. H is A, T or C (CHG: 0.9%  $\pm$  0.26 and CHH: 1.1%  $\pm$  0.25; mean  $\pm$  stdev), indicative of successful bisulfite conversion.

**Table S2.** Comparison of genome-wide DNA methylation levels in pair-wise comparisons of each of the *App<sup>NL-G-F</sup>* and *App<sup>NL-F</sup>* mice to age-matched wild-type controls. A total of 628 and 562 unique significant differentially methylated regions (DMRs; *q*-value < 0.05) were identified.

**Table S3.** Analysis of enrichment of gene ontology (GO) terms among DMR-containing genes. A significant enrichment of several GO terms related to AD was found among the *App<sup>NL-G-F</sup>* DMRs (for example, Regulation of long-term synaptic potentiation (GO:1900271) and Positive regulation of synaptic transmission (GO:0050806); *p*-value < 0.05), but not among *App<sup>NL-F</sup>* DMR-containing genes. Some GO terms relevant to AD are indicated in orange.

**Table S4.** Significant Enrichment of DMR-containing genes in *App<sup>NL-G-F</sup>*, but not *App<sup>NL-F</sup>*, mice for genes associated with several AD-related phenotypes in the National Human Genome Research Institute catalog of published genome-wide association studies (NHGRI-GWAS).
